# Supplementary material for: Healthcare professionals' intentions and behaviours: A systematic review of studies based on social cognitive theories
Source: PubMed Central journal article supplement (PMC2507717; doi:10.1186/1748-5908-3-36), 2008-07-16
Supplement: 1748-5908-3-36-S1.pdf [file 1748-5908-3-36-S1.pdf]

## Additional file 1 – The search strategy

---

| <b>MESH terms, keywords or descriptors</b> | <b>Type of healthcare professionals</b>              |
|--------------------------------------------|------------------------------------------------------|
| Behaviour OR intention                     | Physician                                            |
| Planned behaviour                          | General practitioner                                 |
| Social cognitive theory                    | Different specialities of medicine:                  |
| Bandura's theory                           | anaesthesiologist; geriatrician; gynaecologist;      |
| Triandis' theory                           | haematologist; hospitalist; internist; nephrologist; |
| Psychosocial theory                        | neurologist; obstetrician; oncologist; optometrist;  |
|                                            | paediatrician; psychiatrist; radiologist; resident;  |
|                                            | surgeon; urologist                                   |
|                                            | Chiropractor                                         |
|                                            | Dentist                                              |
|                                            | Dietician                                            |
|                                            | Health professional                                  |
|                                            | Kinesiologist                                        |
|                                            | Mental health professional                           |
|                                            | Nurse                                                |
|                                            | Pharmacist                                           |
|                                            | Physical therapist                                   |
|                                            | Psychologist                                         |

---
