# Supplementary material for: Healthcare professionals' intentions and behaviours: A systematic review of studies based on social cognitive theories
Source: PubMed Central journal article supplement (PMC2507717; doi:10.1186/1748-5908-3-36), 2008-07-16
Supplement: 1748-5908-3-36-S2.pdf [file 1748-5908-3-36-S2.pdf]

## Additional file 2 – Prospective studies aimed at predicting health professionals’ behaviour

| <b>Study</b>               | <b>1. Type of participants</b><br><b>2. Sample size</b> | <b>1. Theoretical framework</b><br><b>2. Behaviour studied</b> | <b>Measure of behaviour</b>                    | <b>Level of correspondence between intention and behaviour</b> | <b>Final model</b>                              | <b>R<sup>2</sup></b> |
|----------------------------|---------------------------------------------------------|----------------------------------------------------------------|------------------------------------------------|----------------------------------------------------------------|-------------------------------------------------|----------------------|
| Bernaix [26]               | 1. Maternal-newborn nurses<br>2. 49                     | 1. TRA<br>2. Providing support for breastfeeding               | Perception of support by mothers (OBJ)         | Good                                                           | Attitude<br>Knowledge<br>Ethnicity<br>Education | 0.56                 |
| Eccles et al. [20]         | 1. General practitioners<br>2. 230                      | 1. OLT<br>2. Managing infections without antibiotics           | Total number of antibiotic prescriptions (OBJ) | Poor                                                           | Habitual behaviour                              | 0.063                |
| Farris & Schopflocher [33] | 1. Community pharmacists<br>2. 182                      | 1. SCT<br>2. Pharmaceutical care                               | Provided or not pharmaceutical care (SR)       | Good                                                           | Self-efficacy                                   | O/S                  |
| Gilomen-Study [21]         | 1. Physicians<br>2. 45                                  | 1. TPB<br>2. Prescribing                                       | Coded prescription data (OBJ)                  | Poor                                                           | Attitude                                        | 0.15                 |

|                        |                         |                                                                  |                                                           |      |                             |        |
|------------------------|-------------------------|------------------------------------------------------------------|-----------------------------------------------------------|------|-----------------------------|--------|
| Godin et al. [27]      | 1. Nurses<br>2. 105     | 1. TPB<br>2. Adherence to universal precautions for venipuncture | Number of time they adhered to universal precautions (SR) | Good | Intention<br>PBC            | 0.28   |
| Harrell & Bennett [22] | 1. Physicians<br>2. 93  | 1. TRA<br>2. Prescribing                                         | Physician panel data (OBJ)                                | Poor | Intention                   | 0.27   |
| Hoppe [31]             | 1. Nurses<br>2. 132     | 1. TPB<br>2. Weight loss management                              | Number of time they raised the issue of weight loss (SR)  | Good | Intention<br>Self-efficacy  | 0.46   |
| Lambert et al. [23]    | 1. Physicians<br>2. 19  | 1. TRA<br>2. Antibiotic prescribing                              | Antibiotic prescribing data (OBJ)                         | Poor | -                           | 0.0049 |
| Mason [34]             | 1. Pharmacists<br>2. 40 | 1. TRA<br>2. Counseling                                          | Direct observation (OBJ)                                  | Good | Attitude<br>Subjective norm | 0.33   |
| Maue et al. [24]       | 1. Providers<br>2. 33   | 1. TPB<br>2. Compliance with practice guidelines                 | Medical record audits (OBJ)                               | Good | Attitude                    | 0.0076 |
| Millstein [25]         | 1. Primary care         | 1. TPB                                                           | Percentage of                                             | Good | Intention                   | 0.40   |

|                     |                                                        |                                                              |                                    |      |                                      |       |
|---------------------|--------------------------------------------------------|--------------------------------------------------------------|------------------------------------|------|--------------------------------------|-------|
|                     | physicians                                             | 2. Providing education                                       | adolescents being                  |      | Subjective norm                      |       |
|                     | 2. 765                                                 | about STD-HIV                                                | educated (SR)                      |      | PBC                                  |       |
| O'Boyle et al. [28] | 1. Nurses in critical &<br>post critical care<br>units | 1. TPB<br>2. Adherence to hand<br>hygiene<br>recommendations | 2-hour observation<br>period (OBJ) | Poor | Intensity of<br>activity in the unit | 0.12  |
|                     | 2. 120                                                 |                                                              |                                    |      |                                      |       |
| Quinn [32]          | 1. Nurses                                              | 1. TRA                                                       | Analysis of patient                | Good | -                                    | 0.01  |
|                     | 2. 50                                                  | 2. Documentation                                             | records (OBJ)                      |      |                                      |       |
| Renfroe et al. [29] | 1. Nurses                                              | 1. TRA                                                       | Analysis of patient's              | Good | Intention                            | 0.15  |
|                     | 2. 108                                                 | 2. Documentation                                             | chart (0.71) <sup>a</sup> (OBJ)    |      |                                      |       |
| Sauls [30]          | 1. Intrapartum nurses                                  | 1. TPB                                                       | Length of labour                   | Poor | -                                    | -0.05 |
|                     | 2. 39                                                  | 2. Labour support                                            | (OBJ)                              |      |                                      |       |
| Wilson [35]         | 1. School                                              | 1. TPB                                                       | Use of consultation                | Good | Intention                            | 0.58  |
|                     | psychologists                                          | 2. Using a consultation                                      | model (SR)                         |      | PBC                                  |       |
|                     | 2. 284                                                 | model                                                        |                                    |      |                                      |       |

---

OBJ: Objective assessment of behaviour; OLT: Operant Learning Theory; O/S Other statistics; SCT: Social Cognitive Theory; SR Self-reported behaviour; TPB: Theory of Planned Behaviour; TRA: Theory of Reasoned Action.

<sup>a</sup> KK-20 reliability coefficient
