# Supplementary material for: Healthcare professionals' intentions and behaviours: A systematic review of studies based on social cognitive theories
Source: PubMed Central journal article supplement (PMC2507717; doi:10.1186/1748-5908-3-36), 2008-07-16
Supplement: 1748-5908-3-36-S3.pdf [file 1748-5908-3-36-S3.pdf]

### Additional file 3 – Studies aimed at predicting health professionals’ intentions

| Study                | 1. Type of participants    | 1. Theoretical framework                                              | Measure of intention          | Final model                                        | R <sup>2</sup> |
|----------------------|----------------------------|-----------------------------------------------------------------------|-------------------------------|----------------------------------------------------|----------------|
|                      | 2. Sample size             | 2. Behaviour studied                                                  | Nb of items (PQ) <sup>a</sup> |                                                    |                |
| Beatty & Beatty [36] | 1. Anaesthetists           | 1. TPB                                                                | 1                             | Attitude                                           | 0.45           |
|                      | 2. 114                     | 2. Violating safety guidelines (not performing a pre-operative visit) |                               | Subjective norm<br>PBC<br>Habit                    |                |
| Bernaix [26]         | 1. Maternal-newborn nurses | 1. TRA                                                                | 3 (0.93)                      | Attitude                                           | 0.72           |
|                      | 2. 49                      | 2. Support of breastfeeding mothers                                   |                               | Subjective norm<br>Ethnicity<br>Level of education |                |
| Bolman et al. [60]   | 1. Nurses                  | 1. ASE                                                                | 1                             | Perceived complexity                               | 0.38           |
|                      | 2. 85                      | 2. Continuing to use a smoking cessation protocol                     |                               | Perceived advantages                               |                |
| Bonnetti et al. [37] | 1. General practitioners   | 1. TPB                                                                | 3 (0.82)                      | Attitude                                           | 0.31           |
|                      | 2. 214                     | 2. Referring for X-ray                                                |                               | PBC                                                |                |
| Bonnetti et al. [83] | 1. General dental          | 1. OLT                                                                | 3 (0.73)                      | Anticipated consequences                           | 0.43           |

|                               |                          |                                                                    |          |                           |      |
|-------------------------------|--------------------------|--------------------------------------------------------------------|----------|---------------------------|------|
|                               | professionals            | 2. Taking intra-oral radiographs                                   |          | Evidence of habit         |      |
|                               | 2. 214                   |                                                                    |          |                           |      |
| Bunce & Birdi [38]            | 1a. Lower grade doctors  | 1. TPB                                                             | 1        | a. Attitude               | 0.43 |
|                               | 1b. Senior doctors       | 2. Requesting hospital autopsies                                   |          | Subjective norm           |      |
|                               |                          |                                                                    |          | PBC                       |      |
|                               | 2b. 48                   |                                                                    |          | b. Attitude               | 0.65 |
|                               | 2a. 70                   |                                                                    |          | Subjective norm           |      |
|                               |                          |                                                                    |          | Past behaviour            |      |
| Busha [39]                    | 1. Family physicians     | 1. TPB                                                             | 1        | Subjective norm           | 0.47 |
|                               | 2. 100                   | 2. Educating about pregnancy prevention (among males 15 years old) |          | PBC                       |      |
|                               |                          |                                                                    |          | Perceived benefices       |      |
| Chau & Hu [40]                | 1. Physicians            | 1. TAM                                                             | 2 (0.77) | Attitude                  | 0.40 |
|                               | 2. 408                   | 2. Using telemedicine technology                                   |          | Perceived usefulness      |      |
| Conner & Heywood-Everett [41] | 1. General practitioners | 1. TPB                                                             | 1        | Subjective norm (SN)      | 0.32 |
|                               | 2. 65                    | 2. Addressing mental health problems (Asian patients)              |          | Motivation to comply (MC) |      |

|                      |                                                                                       |                                                                      |                | Past behaviour                                                                                         |              |
|----------------------|---------------------------------------------------------------------------------------|----------------------------------------------------------------------|----------------|--------------------------------------------------------------------------------------------------------|--------------|
|                      |                                                                                       |                                                                      |                | SN X MC                                                                                                |              |
| Crawford [61]        | 1. Critical care nurses<br>2. 225                                                     | 1. TPB<br>2. Involvement with families in<br>the intensive care unit | 3 (0.85)       | Attitude<br>Subjective norm<br>Internal factors<br>Workload<br>Baccalaureate degree                    | 0.56         |
| Croteau & Vieru [42] | 1a. Physicians in urban<br>areas<br>1b. Physicians in rural areas<br>2a. 85<br>2b. 42 | 1. TAM<br>2. Telemedicine adoption                                   | 4 (-)          | a. Perceived ease of use<br>Perceived usefulness<br>Perceived voluntariness<br>b. Perceived usefulness | 0.60<br>0.48 |
| Daneault et al. [84] | 1. Nurses & dieticians<br>2. 151                                                      | 1. TPB<br>2. Recommending breastfeeding                              | 2 <sup>b</sup> | PBC<br>Perceived professional<br>norm                                                                  | 0.69         |
| Dilorio [62]         | 1. Neuroscience nurses<br>2. 368                                                      | 1. TPB<br>2. Care for persons with                                   | 11 (0.86)      | PBC                                                                                                    | 0.16         |

HIV+/AIDS

|                        |                                |                                            |          |                                                |      |
|------------------------|--------------------------------|--------------------------------------------|----------|------------------------------------------------|------|
| Eccles et al. [20]     | 1. General practitioners       | 1. OLT                                     | 3 (0.68) | Anticipated consequences                       | 0.43 |
|                        | 2. 230                         | 2. Managing infections without antibiotics |          | Habitual behaviour                             |      |
| Edwards et al. [63]    | 1. Nurses                      | 1. TPB                                     | 3 (0.79) | Attitude                                       | 0.40 |
|                        | 2. 446                         | 2. Administering opioids for pain relief   |          | Behavioural beliefs<br>Subjective norm<br>PBC  |      |
| Farris & Kirkking [85] | 1. Community pharmacists       | 1. TRA (TT)                                | 2 (0.65) | Social norm                                    | 0.17 |
|                        | 2. 169                         | 2. Pharmaceutical care                     |          | Frequency of past trying                       |      |
| Faulker & Biddle [86]  | 1. Mental health professionals | 1. TPB                                     | 2 (0.84) | Attitude                                       | 0.71 |
|                        | 2. 394                         | 2. Promoting physical activity             |          | Subjective norm<br>PBC<br>Past stage of change |      |
| Feug & Wu [64]         | 1. Nurses                      | 1. TPB                                     | 4 (0.62) | Attitude                                       | 0.91 |
|                        | 2. 1362                        | 2. Reporting child abuse (severe cases)    |          | Subjective norm<br>PBC                         |      |

|                      |                                                  |                                                                                          |           | Knowledge                                                |      |
|----------------------|--------------------------------------------------|------------------------------------------------------------------------------------------|-----------|----------------------------------------------------------|------|
| Fisher & Pathak [43] | 1. Physicians<br>2. 93                           | 1. TRA<br>2. Using pharmacists as drug information consultants                           | 1         | Attitude                                                 | 0.23 |
| Foy et al. [87]      | 1. Mental health professionals<br>2. 373         | 1. TPB<br>2. Disclosing a diagnostic of dementia (Exploring what patients already knows) | 2 (0.85)  | Attitude<br>Emotional attitude<br>Subjective norm<br>PBC | 0.29 |
| Foy et al. [44]      | 1. Gynaecologists<br>2. 151                      | 1. TPB<br>2. Guideline compliance (Assessing an appointment within 5 days of referral)   | 3 (>0.70) | Subjective norm                                          | 0.27 |
| Gagnon et al. [46]   | 1. General practitioners<br>2. 519               | 1. TIB<br>2. Acceptance of telemedicine                                                  | 3 (0.84)  | Normative factors<br>Self identity                       | 0.81 |
| Gagnon et al. [45]   | 1a. Ophthalmologists<br>1b. Orthopaedic surgeons | 1. TIB<br>2. Using the Health Technology Assessment recommendations                      | 3 (0.85)  | a. Attitudinal beliefs<br>Personal normative beliefs     | 0.87 |

|                     |                           |                                                                     |                |                            |      |
|---------------------|---------------------------|---------------------------------------------------------------------|----------------|----------------------------|------|
|                     | 2a. 35                    |                                                                     |                | Social normative beliefs   | 0.65 |
|                     | 2b. 61                    |                                                                     |                | b. Facilitating conditions |      |
|                     |                           |                                                                     |                | Personal normative beliefs |      |
|                     |                           |                                                                     |                | Habit                      |      |
| Gaither et al. [47] | 1. Physicians             | 1. TRA                                                              | 1              | Attitude                   | 0.14 |
|                     | 2. 87                     | 2. Utilization of drug information sources (physicians, colleagues) |                |                            |      |
| Gilomen-Study [21]  | 1. Physicians             | 1. TPB                                                              | 1              | Attitude                   | 0.59 |
|                     | 2. 45                     | 2. Prescribing                                                      |                |                            |      |
| Godin et al. [48]   | 1a. General practitioners | 1. TPB                                                              | 2 <sup>c</sup> | a. Attitude                | 0.83 |
|                     | 1b. Residents             | 2. Recommending complementary and alternative medicine              |                | PBC                        |      |
|                     | 2a. 201                   |                                                                     |                | Moral norm                 |      |
|                     | 2b. 144                   |                                                                     |                | Descriptive norm           |      |
|                     |                           |                                                                     |                | b. Attitude                | 0.66 |
|                     |                           |                                                                     |                | PBC                        |      |
|                     |                           |                                                                     |                | Moral norm                 |      |

|                   |                         |                                                          |          |                                                                                      |      |
|-------------------|-------------------------|----------------------------------------------------------|----------|--------------------------------------------------------------------------------------|------|
| Godin et al. [49] | 1. Physicians<br>2. 852 | 1. TPB<br>2. Examining an HIV+/AIDS patient              | 1        | Attitude<br>Perceived norm<br>Self-efficacy<br>Tests<br>Sex X age<br>Risk X attitude | 0.50 |
| Godin et al.[95]  | 1. Dentists<br>2. 771   | 1. TPB<br>2. Providing dental care to HIV+/AIDS patients | 2 (0.90) | PBC<br>Personal normative beliefs<br>Habit                                           | 0.71 |
| Godin et al. [50] | 1. Physicians<br>2. 667 | 1. TPB<br>2. Wearing gloves                              | 1        | Attitude<br>PBC<br>Perceived social norm<br>Perceived risk<br>Habit<br>Age           | O/S  |
| Godin et al. [27] | 1. Nurses               | 1. TPB                                                   | 4 (0.82) | Barriers                                                                             | 0.68 |

|                         |                         |                                                        |          |                                                                     |      |
|-------------------------|-------------------------|--------------------------------------------------------|----------|---------------------------------------------------------------------|------|
|                         | 2. 156                  | 2. Adherence to universal precautions for venipuncture |          | Subjective norm<br>Personal normative beliefs                       |      |
| Herbert & Benbasat [65] | 1. Nurses               | 1. TRA                                                 | 4 (-)    | Relative advantages                                                 | 0.77 |
|                         | 2. 151                  | 2. Adoption of information technology                  |          | Result demonstrability<br>Compatibility<br>Normative beliefs        |      |
| Herbert et al. [88]     | 1. Pharmacists          | 1. TPB                                                 | 6 (0.88) | Attitude                                                            | 0.63 |
|                         | 2. 203                  | 2. Providing therapy management services               |          | Subjective norm<br>PBC                                              |      |
| Hoppe [31]              | 1. Nurses               | 1. TPB                                                 | 6 (0.94) | Attitude                                                            | 0.60 |
|                         | 2. 102                  | 2. Obesity management                                  |          | Subjective norm<br>Self-efficacy<br>Self-identity<br>Past behaviour |      |
| Hu et al. [51]          | 1. Physicians           | 1. TAM                                                 | 6 (0.86) | Attitude                                                            | 0.44 |
|                         | 2. 408                  | 2. Adoption of telemedicine                            |          | Perceived usefulness                                                |      |
| Jenner et al. [89]      | 1. Health professionals | 1. TPB                                                 | 4 (0.78) | Attitude                                                            | O/S  |



|                     |                   |                                                     |          |                         |      |
|---------------------|-------------------|-----------------------------------------------------|----------|-------------------------|------|
|                     | 2. 100            | 2. Hand hygiene practice                            |          | Personal responsibility |      |
| Jones et al. [52]   | 1. Oncologists    | 1. TPB                                              | 1        | Attitude                | 0.22 |
|                     | 2. 281            | 2. Recommending to exercise                         |          | Subjective norm         |      |
|                     |                   |                                                     |          | PBC                     |      |
| Jurgens [66]        | 1. Nurses         | 1. TPB                                              | 2 (0.69) | Attitude                | 0.63 |
|                     | 2. 149            | 2. administering morphine for<br>postoperative pain |          | PBC                     |      |
|                     |                   |                                                     |          | Control beliefs         |      |
| Kittisopee [90]     | 1. Pharmacists    | 1. TPB                                              | 3 (0.76) | Attitude                | 0.78 |
|                     | 2. 269            | 2. Pharmaceutical care                              |          | Subjective norm         |      |
|                     |                   |                                                     |          | PBC                     |      |
|                     |                   |                                                     |          | Agreeableness           |      |
| Klaybor [91]        | 1. Social workers | 1. TPB                                              | 2 (-)    | Attitude                | 0.25 |
|                     | 2. 249            | 2. Using the DSM-IV for<br>treatment planning       |          | Norm                    |      |
|                     |                   |                                                     |          | PBC                     |      |
| Lambert et al. [23] | 1. Physicians     | 1. TRA                                              | -        | Attitude                | 0.62 |
|                     | 2. 19             | 2. Prescribing                                      |          | Subjective norm         |      |
| Laschinger &        | 1. Nurses         | 1. TRA                                              | 1        | Attitude                | 0.19 |

|                        |                                    |                                            |                       |                                            |      |
|------------------------|------------------------------------|--------------------------------------------|-----------------------|--------------------------------------------|------|
| Goldenberg [67]        | 2. 141                             | 2. Care for HIV+ patients                  |                       |                                            |      |
| Laschinger et al. [68] | 1. Community health nurses         | 1. TRA                                     | 1                     | Attitude                                   | 0.19 |
|                        | 2. 145                             | 2. Care for HIV+ patients                  |                       |                                            |      |
| Lavoie et al. [69]     | 1. Nurses                          | 1. TPB                                     | 4 (0.82)              | Attitude (cognitive)                       | 0.86 |
|                        | 2. 119                             | 2. Selecting a given level of care         |                       | Perceived professional norm<br>Living will |      |
| Légaré et al. [53]     | 1a. General practitioners (France) | 1. TPB                                     | 2 (0.84) <sup>d</sup> | a. Role beliefs                            | O/S  |
|                        | 1b. Gynaecologists (France)        | 2. Prescribing hormone replacement therapy |                       | PBC                                        |      |
|                        | 1c. General practitioners (Québec) |                                            |                       | Control beliefs                            |      |
|                        | 1d. Gynaecologists (Québec)        |                                            |                       | Cessation of menses                        |      |
|                        | 2a. 419                            |                                            |                       | b. Role beliefs                            |      |
|                        | 2b. 577                            |                                            |                       | Moral norm                                 |      |
|                        | 2c. 333                            |                                            |                       | Control beliefs                            |      |
|                        |                                    |                                            |                       | Lipid profile                              |      |
|                        |                                    |                                            |                       | c. Moral norm                              |      |
|                        |                                    |                                            |                       | Control beliefs                            |      |

|                           |                                                     |                                                                  |                 |                                                     |      |
|---------------------------|-----------------------------------------------------|------------------------------------------------------------------|-----------------|-----------------------------------------------------|------|
|                           | 2d. 129                                             |                                                                  |                 | Cytology                                            |      |
|                           |                                                     |                                                                  |                 | Hormonal dosage                                     |      |
|                           |                                                     |                                                                  |                 | d. Moral norm                                       |      |
|                           |                                                     |                                                                  |                 | Control beliefs                                     |      |
| Légaré et al. [54]        | 1. Physicians and residents<br>2. 121               | 1. TPB<br>2. Screening for decisional<br>conflict                | 3 (0.79)        | Attitude<br>Subjective norm<br>PBC<br>Clinical site | 0.70 |
| Levin et al. [92]         | 1. Nurses & medical<br>laboratory workers<br>2. 527 | 1. TPB<br>2. Wearing gloves                                      | 1               | Attitude<br>PBC<br>Perceived risk                   | 0.73 |
| Liabsuetrakul et al. [55] | 1. Obstetricians<br>2. 50                           | 1. TPB<br>2. Administration of antibiotic<br>after cord clamping | - <sup>e</sup>  | Subjective norm                                     | 0.25 |
| Limbert & Lamb [56]       | 1a. Hospital doctors<br>1b. Hospital doctors        | 1. TPB<br>2a. Compliance with asthma<br>guidelines               | a.1<br>b. 3 (-) | a. Attitude<br>Subjective norm<br>PBC               | 0.58 |

|                      |                                        |                                                 |           |                     |      |
|----------------------|----------------------------------------|-------------------------------------------------|-----------|---------------------|------|
|                      | 2a. 223                                | 2b. Compliance with antibiotic                  |           | b. Attitude         | 0.52 |
|                      | 2b. 214                                | guidelines                                      |           | Subjective norm     |      |
|                      |                                        |                                                 |           | PBC                 |      |
| Maue et al. [24]     | 1. Physicians & nurse<br>practitioners | 1. TPB                                          | 2 (>0.60) | Attitude            | 0.68 |
|                      | 2. 60                                  | 2. Compliance with guidelines                   |           | PBC                 |      |
|                      |                                        |                                                 |           | Level of difficulty |      |
| McKinlay et al. [70] | 1. Nurses                              | 1. TRA                                          | 2 (-)     | Attitude            | 0.66 |
|                      | 2. 74                                  | 2. Care of self-poisoning patients              |           | Subjective norm     |      |
| Milstein [25]        | 1. Primary care physicians             | 1. TPB                                          | 1         | Attitude            | 0.27 |
|                      | 2. 765                                 | 2. Providing education about<br>STD-HIV         |           | Social norm         |      |
|                      |                                        |                                                 |           | PBC                 |      |
| Nash et al. [71]     | 1. Nurses                              | 1. TRA                                          | 2 (-)     | PBC                 | 0.21 |
|                      | 2. 100                                 | 2. Pain assessment                              |           |                     |      |
| O'Boyle et al. [28]  | 1. Nurses                              | 1. TPB                                          | 5 (0.74)  | Subjective norm     | 0.56 |
|                      | 2. 120                                 | 2. Adherence to hand hygiene<br>recommendations |           | Control beliefs     |      |
| Payant [72]          | 1. Nurses                              | 1. TPB                                          | 3 (0.91)  | Subjective norm     | 0.55 |

|                          |                            |                                        |           |                        |      |
|--------------------------|----------------------------|----------------------------------------|-----------|------------------------|------|
|                          | 2. 97                      | 2. Providing continuous labour support |           | PBC                    |      |
|                          |                            |                                        |           | Labour support courses |      |
| Pessoa-silva et al. [93] | 1. Healthcare workers      | 1. TPB                                 | 12 (0.81) | Perceived difficulties | O/S  |
|                          | 2. 61                      | 2. Hand hygiene                        |           | Subjective norm        |      |
| Puffer & Rashidian [73]  | 1. Nurses                  | 1. TPB                                 | 2 (0.62)  | Attitude               | 0.40 |
|                          | 2. 48                      | 2. Using clinical guidelines           |           | PBC                    |      |
| Renfroe et al. [29]      | 1. Nurses                  | 1. TRA                                 | 2 (-)     | Attitude               | 0.46 |
|                          | 2. 108                     | 2. Documentation                       |           | Subjective norm        |      |
| Ryu et al. [57]          | 2. Physicians              | 1. TPB                                 | 5 (0.91)  | Attitude               | O/S  |
|                          | 3. 286                     | 2. Knowledge sharing                   |           | Subjective norm        |      |
|                          |                            |                                        |           | PBC                    |      |
| Sable et al. [58]        | 1. Primary care physicians | 1. TRA                                 | 5 (-)     | Attitude               | N/A  |
|                          | 2. 96                      | 2. Prescribing                         |           | Subjective norm        |      |
| Sauls [30]               | 1. Intrapartum nurses      | 1. TPB                                 | 27 (-)    | Attitude               | 0.67 |
|                          | 2. 39                      | 2. Providing labour support            |           | Subjective norm        |      |
| Schottle [74]            | 1. Obstetrical nurses      | 1. TPB                                 | 1         | Attitude               | 0.52 |

|                          |                          |                                                         |          |                                                |      |
|--------------------------|--------------------------|---------------------------------------------------------|----------|------------------------------------------------|------|
|                          | 2. 26                    | 2. Collaborating with midwives                          |          | Subjective norm                                |      |
| Tessaro & Highriter [75] | 1. Nurses                | 1. TRA                                                  | 4 (0.86) | Attitude                                       | N/A  |
|                          | 2. 311                   | 2. Working with HIV+/AIDS patients                      |          | Subjective norm                                |      |
|                          |                          |                                                         |          | Prior behaviour                                |      |
|                          |                          |                                                         |          | Ever cared for patients with HIV/AIDS patients |      |
|                          |                          |                                                         |          | Number of years in public health               |      |
|                          |                          |                                                         |          | Supervisory position                           |      |
| Vermette & Godin [76]    | 1. Nurses                | 1. TPB                                                  | 3 (0.83) | Attitude                                       | 0.48 |
|                          | 2. 102                   | 2. Providing care at home to AIDS or leukaemia patients |          | Personal normative beliefs                     |      |
|                          |                          |                                                         |          | PBC                                            |      |
|                          |                          |                                                         |          | Homophobia                                     |      |
| Walker et al. [59]       | 1. General practitioners | 1. TPB                                                  | 1        | PBC                                            | 0.62 |
|                          | 2. 126                   | 2. Prescribing                                          |          | Control beliefs                                |      |
|                          |                          |                                                         |          | Past behaviour                                 |      |
| Walker et al. [94]       | 1. Community pharmacists | 1. TPB                                                  | 2 (0.85) | Attitude                                       | 0.14 |

|                          |                     |                                                                     |          |                            |      |
|--------------------------|---------------------|---------------------------------------------------------------------|----------|----------------------------|------|
|                          | 2. 76               | 2. Treatment of vaginal candidiasis with non-prescription medicines |          |                            |      |
| Wallace et al. [77]      | 1. Nurses           | 1. TRA                                                              | 4 (0.72) | Attitude                   | 0.39 |
|                          | 2. 85               | 2. Providing oral care to patients receiving chemotherapy           |          | Subjective norm            |      |
| Walsh et al. [78]        | 1. Pediatric nurses | 1. TPB                                                              | 2 (0.73) | Beliefs-based attitude     | 0.25 |
|                          | 2. 51               | 2. Fever management                                                 |          | Subjective norm            |      |
|                          |                     |                                                                     |          | Indirect control           |      |
| Waltman & Corless [79]   | 1. Nurses           | 1. TRA                                                              | 12 (-)   | Attitude                   | 0.72 |
|                          | 2. 372              | 2. Care of the dying                                                |          | Normative beliefs          |      |
| Watson & Myers [80]      | 1. Nurses           | 1. TPB                                                              | 3 (0.75) | Attitude                   | 0.45 |
|                          | 2. 103              | 2. Clinical glove use                                               |          | PBC                        |      |
|                          |                     |                                                                     |          | Barriers                   |      |
| Werner & Mendelsson [81] | 1. Nurses           | 1. TRA                                                              | 4 (0.70) | Attitude                   | 0.48 |
|                          | 2. 303              | 2. Using physical restraints with older people                      |          | Subjective norm            |      |
|                          |                     |                                                                     |          | Perceived moral obligation |      |

|                    |                         |                                      |           |                                                                                                |      |
|--------------------|-------------------------|--------------------------------------|-----------|------------------------------------------------------------------------------------------------|------|
| Whitby et al. [82] | 1. Nurses               | 1. TPB                               | -         | Attitude                                                                                       | 0.64 |
|                    | 2. 754                  | 2. Elective in-hospital hand washing |           | Subjective norm<br>Perceived peer behaviour<br>Effort required<br>Elective community behaviour |      |
| Wilson [35]        | 1. School psychologists | 1. TPB                               | 10 (0.93) | Attitude                                                                                       | 0.46 |
|                    | 2. 284                  | 2. Using a consultation model        |           | Subjective norm<br>PBC                                                                         |      |

---

ASE: Attitude, Social and Self-Efficacy Model; N/A: Not available; PBC: Perceived behavioral control; PQ: Psychometric qualities; OLT: Operant Learning Theory; O/S: Other statistics; SCT: Social Cognitive Theory; TAM: Technology Acceptance Model; TIB: Theory of Interpersonal Behaviour; TPB: Theory of Planned Behaviour; TRA: Theory of Reasoned Action; TT: Theory of Trying.

<sup>a</sup> Cronbach's Alpha coefficient ( $\alpha$ )

<sup>b</sup> Alpha coefficients were considered sufficient for all variables including intention

<sup>c</sup>  $\alpha$  (0.77 à 0.88) or r (0.55 à .71) for all constructs including intention

<sup>d</sup> Pearson correlation coefficient



<sup>e</sup> Alpha coefficients ranged from 0.64 to 0.85 for all variables including intention
