# Supplementary material for: Healthcare professionals' intentions and behaviours: A systematic review of studies based on social cognitive theories
Source: PubMed Central journal article supplement (PMC2507717; doi:10.1186/1748-5908-3-36), 2008-07-16
Supplement: 1748-5908-3-36-S4.pdf [file 1748-5908-3-36-S4.pdf]

## Additional file 4 – Classification of variables

| <b>Domains</b>                          | <b>Constructs</b>                                                                                                                                                                                                                                                                                                                                                                                                                                                                                                                                          |
|-----------------------------------------|------------------------------------------------------------------------------------------------------------------------------------------------------------------------------------------------------------------------------------------------------------------------------------------------------------------------------------------------------------------------------------------------------------------------------------------------------------------------------------------------------------------------------------------------------------|
| Knowledge                               | Knowledge, perceived similarity between guidelines and current practice                                                                                                                                                                                                                                                                                                                                                                                                                                                                                    |
| Social / professional role and identity | Competence and professionalism, image, personal responsibility, professional norm, role beliefs, self-identity,                                                                                                                                                                                                                                                                                                                                                                                                                                            |
| Moral norm                              | Moral norm, personal normative beliefs                                                                                                                                                                                                                                                                                                                                                                                                                                                                                                                     |
| Beliefs about capabilities              | Compatibility, computer avoidance, continuing education, control beliefs, decision difficulty, ease to use, likelihood of a clinical situation arising, likelihood of using the pharmacist in a situation, organizational barriers, perceived barriers, perceived behavioural control, perceived complexity, perceived effort required, perceived facilitating conditions/factors, perceived ease to use, perceived level of difficulty, potential work-related exposure, self-efficacy, time, voluntarism, workload, personal & professional interactions |
| Beliefs about consequences              | Anticipated consequences, attitude, behavioural beliefs, external factors (not be adequately reimbursed & time-consuming), pain beliefs, perceived advantages, perceived benefices, perceived                                                                                                                                                                                                                                                                                                                                                              |

|                                         |                                                                                                                                                                                                                                               |
|-----------------------------------------|-----------------------------------------------------------------------------------------------------------------------------------------------------------------------------------------------------------------------------------------------|
|                                         | consequences, perceived moral obligation, perceived risk, perceived utility, results demonstrability,                                                                                                                                         |
| Motivation and goals                    | Intention                                                                                                                                                                                                                                     |
| Environmental context and resources     | Clinical site, situational support, intensity of activity in the nursing unit, environment, settings, adequacy of resources, practice pattern-related, examinations performed,                                                                |
| Social influences                       | administrative support, cosmopolitan perspective, descriptive norm, family factors, modeling, normative beliefs, normative factors, perceived peer behaviour social norm, social participation, social support, subjective norm, team support |
| Emotion                                 | Affect, anxiety, emotional attitude, emotional response, experienced consequences, homophobia, reluctance to disclose uncertainty                                                                                                             |
| Past behaviour / habit                  | actual behaviour, community hand washing, evidence of habitual behaviour, habit, in-hospital hand washing, experience, negative experience, positive experience                                                                               |
| Characteristics of health professionals | Socio-demographic, personal breastfeeding histories, personality (extraversion, neuroticism, agreeableness, openness, conscientiousness)                                                                                                      |

---

Adapted from Michie et al. (2005)
